# Supplementary material for: Runx1 and Runx3 Are Involved in the Generation and Function of Highly Suppressive IL-17-Producing T Regulatory Cells
Source: PubMed Central journal article supplement (PMC3440330; doi:10.1371/journal.pone.0045115), 2012-09-12
Supplement: pone.0045115.s001.pdf [file pone.0045115.s001.pdf]

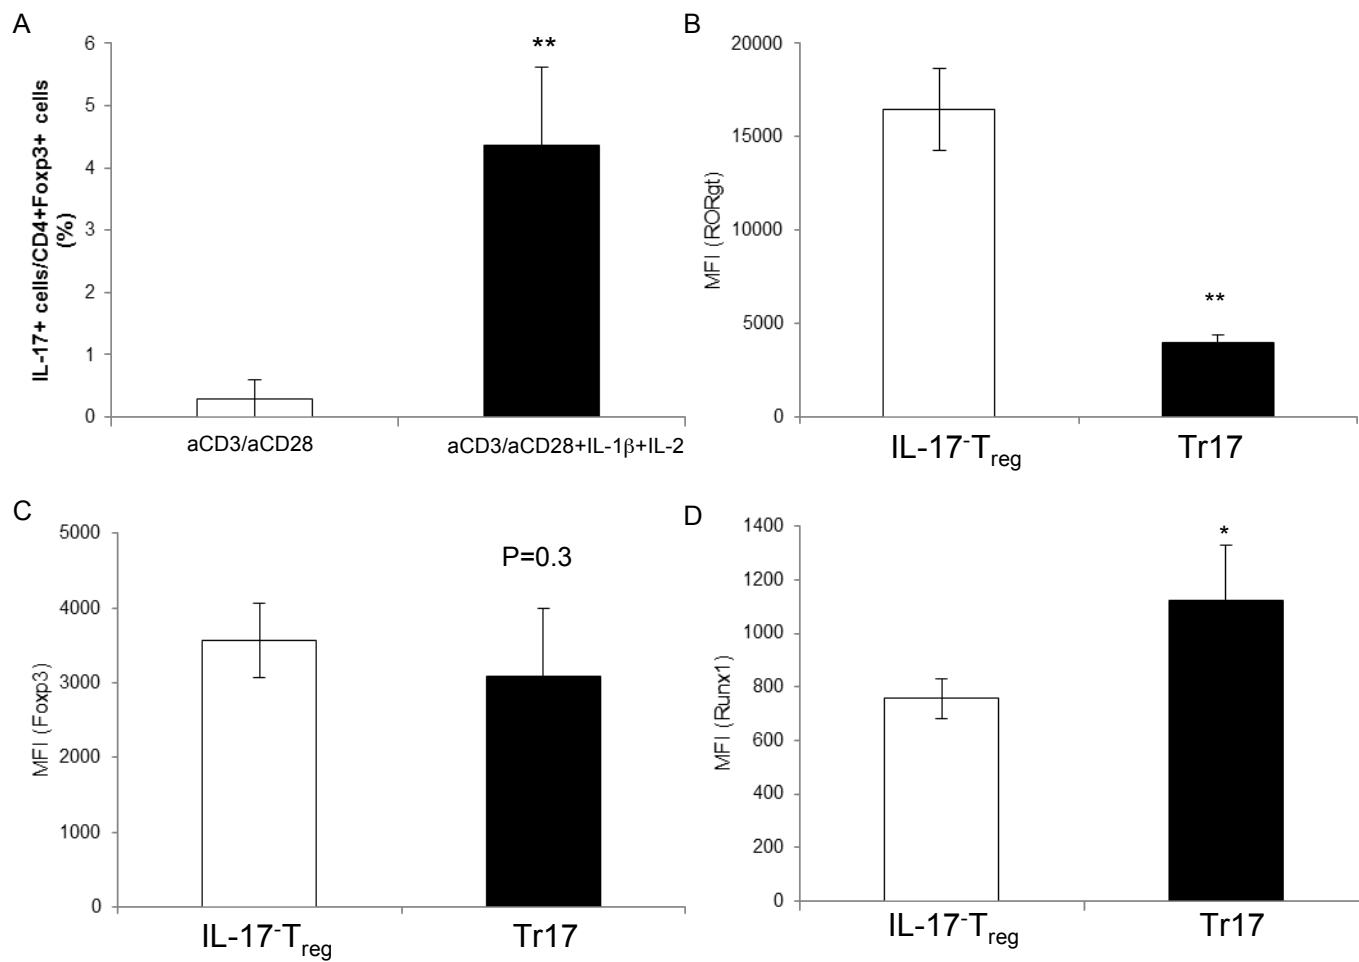

Figure S1
